# 1 TOR represses stress responses through global regulation of H3K27 2 trimethylation in plants

3

4 Yihan Dong<sup>1, 3, @</sup>, Veli V. Uslu<sup>2, 3, @</sup>, Alexandre Berr<sup>1</sup>, Gaurav Singh<sup>1</sup>, Csaba Papdi<sup>1</sup>, Victor A Steffens<sup>2</sup>,  
5 Thierry Heitz<sup>1</sup> and Lyubov Ryabova<sup>1, @</sup>

6

7 1. Institute de Biologie Moléculaire des Plantes, Centre National de la Recherche Scientifique,  
8 UPR 2357, Université de Strasbourg, Strasbourg, France.

9 2. AgroScience GmbH, Neustadt an der Weinstraße, 67435, Germany.

10 3. These authors contributed equally.

11

12 @Corresponding authors:

13 [yihan.dong@ibmp-cnrs.unistra.fr](mailto:yihan.dong@ibmp-cnrs.unistra.fr)

14 [velivural.uslu@agrosience.rlp.de](mailto:velivural.uslu@agrosience.rlp.de)

15 [lyuba.ryabova@ibmp-cnrs.unistra.fr](mailto:lyuba.ryabova@ibmp-cnrs.unistra.fr)

16

## 17 Summary

18 **Combinations of epigenetic modifications H3K4me3 and H3K27me3 implicate bistable**  
19 **feature which alternates between on and off state allowing rapid transcriptional changes**  
20 **upon external stimuli. Target of Rapamycin (TOR) functions as a central sensory hub to link**  
21 **a wide range of external stimuli to gene expression. However, the mechanisms underlying**  
22 **stimulus-specific transcriptional reprogramming by TOR remains elusive. Our *in silico***  
23 **analysis in *Arabidopsis* demonstrates that TOR-repressed genes are associated with either**  
24 **bistable or silent chromatin domains. Both domains regulated by TOR signaling pathway are**  
25 **associated with high level of H3K27me3 deposited by CURLY LEAF (CLF) in specific context**  
26 **with LIKE HETEROCHROMATIN PROTEIN1 (LHP1). Chromatin remodeler SWI2/SNF2 ATPase**  
27 **BRAHMA (BRM) activates TOR-repressed genes only at bistable chromatin domains to**  
28 **rapidly induce biotic stress responses. Here we demonstrated both *in silico* and *in vivo* that**  
29 **TOR represses transcriptional stress responses through global maintenance of H3K27me3.**

30

## 31 Introduction

32 The protein kinase TOR is a conserved sensor of nutrient availability and energy status in  
33 eukaryotes, known to regulate many fundamental cellular processes, such as translation,  
34 autophagy and cell cycle (Saxton and Sabatini, 2017). In animals, since diet and nutrient exert  
35 transgenerational effect, correlations between TOR functions and epigenome variations  
36 started to be explored (Larabee and Weisman, 2020). Histone acetylation is the most  
37 characterized mark regulated by TOR signaling to control rDNA transcription. Recently,  
38 mammalian/mechanistic TOR complex 1 (mTORC1) was found to activate its canonical  
39 substrate S6K1 which further phosphorylates H2B to influence global histone methylation  
40 (Larabee and Weisman, 2020). Unlike in animals, little is known in plants to link TOR function  
41 to epigenetic modifications.

42

43 As sessile organisms, plants continuously and rapidly adjust their development to a multitude  
44 of environmental stresses that often occur suddenly and/or simultaneously. Beyond stress  
45 sensing and signal transduction, plant TOR tunes developmental plasticity via its capacity to  
46 re-program the transcriptome (Xiong et al., 2013). This global transcriptional reprogramming  
47 is partially mediated by the retention of ethylene-insensitive protein 2 (EIN2) in the cytoplasm  
48 to allow gene expression involved in DNA replication and cell wall biosynthesis (Fu et al., 2021).  
49 However, it still remains obscure how an active TOR can suppress stress response and defense

50 mechanism at transcriptional level. Among other mechanisms, epigenetic modifications such  
51 as DNA methylation and histone modifications have emerged as fundamental mediators in  
52 controlling gene expression. For example, methylation of histone H3 on lysine 27 (H3K27) is  
53 classically associated with gene repression, whereas methylation on H3K4 usually increases  
54 gene expression. Here we are interested in whether epigenetic modification underlies TOR-  
55 mediated transcriptional reprogramming.

56  
57 Multiple combinations of different epigenetic modifications exist at the whole genome level  
58 and contribute to the complexity of epigenetic landscapes. By reducing their dimensionality,  
59 a detailed bioinformatic integration of epigenomic data defines distinctive chromatin states  
60 (CS) in *A. thaliana* (Sequeira-Mendes et al., 2014). These states display specific features that  
61 are linked to inactive or active transcription. Two silent states CS-8 and 9 are enriched in  
62 H3K9me2 and H3K27me1 and preferentially mark different chromatin regions. Another  
63 inactive state CS-5 represents the typical Polycomb-regulated facultative heterochromatin  
64 with abundant H3K27me3. Meanwhile, CS-1, 3 and 6 are characterized by high amounts of  
65 active marks (*e.g.*, H3K4me3, H3 acetylation, H3K36me3) and typically found at actively  
66 transcribed genes. Interestingly, despite their opposite effect on transcription, H3K4me3 and  
67 H3K27me3 can co-reside at a number of dynamically regulated genes in both animals and  
68 plants. This feature is the hallmark of CS-2, a state preferentially found at the promoter of  
69 genes with transcript amounts similar to the ones marked by CS-5. A bistable model of  
70 regulation achieved through the delicate balance between H3K4me3 and H3K27me3 was  
71 proposed to poise silenced genes marked by CS-2 for rapid activation upon need (Schwartz et  
72 al., 2010; Sneppen and Ringrose, 2019). Adding additional layers of complexity, chromatin-  
73 binding proteins like H3K27me3 reader LIKE HETEROCHROMATIN PROTEIN 1 (LHP1) or  
74 SWI2/SNF2 ATPase BRAHMA (BRM) further subdivide these chromatin domains into distinct  
75 subdomains (Gomez-Zambrano et al., 2019; Liu et al., 2018; Torres and Deal, 2019).

76  
77 In this study, we show that specific epigenetic features represent a dynamic hallmark of  
78 stimulus-specific transcriptional responses mediated by TOR signaling upon environmental  
79 stimuli. We demonstrate that active TOR represses genes associated with bistable (CS2) or  
80 silent chromatin domains (CS5) by mediating the deposition of H3K27me<sup>3</sup> via CLF and LHP1.  
81 We propose a model in which environmental stimuli inhibit TOR, which subsequently allows  
82 BRM to reduce repression of bistable domains to rapidly activate biotic stress specific gene  
83 expression.

84

## 85 **Results**

### 86 **TOR-repressed genes are associated with CS-2 and CS-5 at the transcription start site**

87 First, we performed gene ontology (GO) enrichment analysis to assess whether specific  
88 functional categories are enriched in any of the previously described chromatin states  
89 (Sequeira-Mendes et al., 2014). Arabidopsis genes were individually assigned to one of the  
90 nine chromatin states based on the chromatin state present at their TSS. Surprisingly, each of  
91 the nine chromatin states were specifically enriched in distinct functional categories  
92 ([Supplementary table 1](#)). Indeed, genes related to protein and RNA processes appeared highly  
93 enriched in CS-1, 3 and 6, which are characterized by the presence of active epigenetic marks.  
94 The Polycomb-associated CS-5 contained significantly more transcription, cell differentiation,  
95 and redox-regulation related genes. Abiotic and biotic stress genes are overrepresented in the  
96 bistable CS-2. Worth noting, functional categories enriched in CS-2 resemble the primary  
97 target genes in stress and immune response pathways repressed by TOR (Dong et al., 2015).

98

99 To analyze particular chromatin state enrichments among TOR-repressed transcripts, from  
100 published datasets we extracted a list of genes up-regulated (fold change>2.0; p<0.05) upon  
101 TOR inhibition by AZD8055 (AZDup, 1583 genes) or RNA interference (TOR-RNAi, 369 genes)  
102 (Caldana et al., 2013; Dong et al., 2015). 233 genes upregulated in both conditions were  
103 significantly enriched at their TSS in the bistable CS-2 and also in the canonical Polycomb CS-  
104 5 (fig. 1a). These findings suggest that the repression of gene expression by TOR is achieved  
105 through either CS-2 or CS-5, two chromatin states sharing high levels of the repressive  
106 modification H3K27me3. Furthermore, by distinguishing up-regulated genes depending on  
107 their fold change, we observed that the CS-5 enrichment gradually increases with the fold  
108 change, which is also the case for CS-2 but not beyond 16-fold change. In addition, more than  
109 half of the CS-2 genes change only 2-4-fold (fig. 1b and supplementary fig. 1). This striking  
110 difference could reflect the bistability of CS-2, in which frequent switches between active and  
111 silent state may occur, resulting in a low rate of basal transcription and finetuning upon TOR  
112 inhibition. TOR-repressed genes marked by the monostable silent CS-5 are likely under  
113 complete repression.

114

115 Next, using GO analysis, we tested whether AZDup genes marked by either CS-2 or CS-5 are  
116 enriched in particular functional categories. Interestingly, AZDup genes marked by CS-2 are  
117 enriched in biotic stress and defense mechanisms mediated by phytohormone signaling (fig.  
118 1c, d), whereas, abiotic stress related genes involved in oxidative stress and hypoxia response  
119 are more abundant among AZDup genes with CS-5 features (fig. 1e). These findings indicate  
120 that the TOR suppressed genes are preset by bistable CS-2 and silent CS-5 properties and  
121 specific signals can attenuate TOR-mediate repression towards CS-2 and CS-5 genes.

122

### 123 **The chromatin context of TOR-responsive genes coordinately repressed by CLF and LHP1** 124 **specify their biological function**

125 Based on the preferential association between TOR repressed genes and CS-2/5, both  
126 characterized by the presence of H3K27me3, we hypothesized that a functional link may exist  
127 between chromatin factors involved in H3K27me3 deposition and TOR. We tested this  
128 hypothesis by collating the TOR repressed gene set with transcript profiles of Polycomb  
129 mutants. CURLY LEAF (CLF), a Polycomb group protein (PcG), is known to be a major H3K27  
130 tri-methylase in plants (Mozgova and Hennig, 2015). A total of 84 genes are shared between  
131 AZDup and those genes upregulated in the loss-of-function *clf28* and *clf29* mutants (fig. 2a).  
132 These shared genes display a significantly higher association with CS-2 (OR=3.86) at their TSS  
133 than the AZDup or the up-regulated genes in either *clf28* or *clf29* (fig. 2b and supplementary  
134 fig. 2a). Reinforcing this positive association, the CS-2 enrichment of AZDup decreases when  
135 the genes up-regulated in *clf* mutants are excluded (AZDnoc*clf28/29*; fig. 2b). Similarly, the CS-  
136 5 enrichment is remarkably higher for genes upregulated in both AZDup and *clf* mutants  
137 compared to the genes upregulated only in AZDup (AZDnoc*clf28/29*; fig. 2b and supplementary  
138 fig. 2a). These observations suggest a synergistic enrichment of CLF and TOR repressed genes  
139 in CS-2 and CS-5, two chromatin states characterized by a high level of the repressive  
140 modification H3K27me3. Furthermore, the GO analysis of the 84 commonly up-regulated  
141 genes between AZDup and *clf* mutants points toward a chromatin state dependent functional  
142 categorization. Indeed, commonly up-regulated genes within CS-2 are significantly enriched  
143 in GO categories related to biotic and abiotic stress responses, while the ones within CS-5 are  
144 specifically enriched in the GO term related to redox processes (fig. 2c).

145

146 PcGs are generally classified into two major complexes named Polycomb Repressive  
147 Complexes (PRC1 and PRC2) and CLF, a major PRC2 subunit, selectively collaborates with  
148 different PcGs partners to achieve gene repression in distinct developmental programs.  
149 Among these partners, LHP1, as a CLF cofactor, was previously demonstrated to contribute to  
150 this selectivity with genes up-regulated in different PcG mutants being separated in two  
151 distinct main groups based on their dependency on LHP1 repression (Wang et al., 2016). A  
152 first group represents genes commonly up-regulated in *clf* and *lhp1* mutants and may  
153 correspond to direct targets of CLF and LHP1 (*i.e.*, here after named CLF-LHP1-dependent  
154 genes). The second one refers to genes more specifically affected in PRC1 mutants such as the  
155 double mutant for the catalytic factors AtRING1A and AtRING1B (*i.e.*, here after named PRC1-  
156 PRC2 dependent genes). Thus, to dissect the relationship between TOR and CLF transcriptional  
157 repression and explore its dependency toward LHP1, we tested overlaps between these two  
158 groups and AZDup genes. A significant overlap was observed between AZDup and CLF-LHP1-  
159 dependent genes (fig. 2d), while it was not the case with PRC1-PRC2 dependent genes (fig.  
160 2d). This result suggests that CLF and LHP1 may work concertedly to participate in the  
161 repression of TOR specific target genes.

162  
163 We further investigated the link between TOR and LHP1 by focusing on the 111 genes  
164 commonly upregulated by AZD8055 and in the *lhp1* mutant (fig. 2e). In a manner similar to  
165 genes co-upregulated by AZD and in *clf* mutants, these genes showed a significant enrichment  
166 in both CS-2 and CS-5 (fig. 2f and supplementary fig. 2b). When we analyzed overlap between  
167 LHP1-target genes and genes up-regulated by AZD8055, we found that 445 out of 1583 AZDup  
168 genes are indeed targeted by LHP1 (fig. 2g). Interestingly, the CS-2 enrichment of AZDup genes  
169 was decreased when LHP1 targets were excluded, whereas genes both upregulated by AZD  
170 and targeted by LHP1 present an increased CS-2 enrichment compared to genes *sole*  
171 upregulated by AZD or targeted by LHP1 (fig. 2h). In addition, we noted that the LHP1 targeting  
172 also increase the CS-5 enrichment of AZDup genes (fig. 2h). This observation is reinforced by  
173 the fact that when LHP1 direct targets were excluded the association between AZDup and CS-  
174 5 dropped dramatically (fig.2h and supplementary fig. 2c). Finally, we investigated whether  
175 LHP1 targeting specifies TOR functions using GO analysis. Interestingly, the functional  
176 annotation obtained with the CS-2 subset of AZDup genes targeted by LHP1 is mainly linked  
177 to biotic and abiotic stress-related functions (fig. 2i). On the other hand, the functional  
178 annotations obtained with the CS-5 subset of AZDup genes targeted by LHP1 appears mainly  
179 related to oxidative stress and hypoxia responses (fig 2j). Together, our results indicate that  
180 besides being regulated jointly by CLF and LHP1, TOR repressed targets may further split in  
181 distinct functional categories depending on their respective CS-2 or CS-5 chromatin context.

182  
183 **BRM is important for activating genes associated with CS-2, when TOR is down-regulated in**  
184 **response to biotic stress**

185 TrxG proteins are evolutionarily conserved chromatin-modifying factors that antagonize PcG  
186 repression and interactions between PcG/TrxG support a molecular basis for chromatin  
187 bistability (Ringrose, 2017; Sneppen and Ringrose, 2019). Among TrxG proteins, the  
188 SWItch/Sucrose Non-Fermentable (SWI/SNF)-type protein BRAHMA (BRM) was found to restrict  
189 CLF occupancy/activity at many developmental genes (Shu et al., 2020). We therefore  
190 wondered whether the TrxG protein BRM would participate in establishing bistable chromatin  
191 at the CS-2 subset of TOR regulated genes. Considering BRM as an activator of gene expression,  
192 we observed a significant overlap between AZDup genes and genes down-regulated in *brm1*  
193 mutant (supplementary fig. 3a) and also found that 57% of AZDup genes are BRM targets (fig.

194 3a). Moreover, the CS-2 enrichment among BRM targets was further reinforced when  
195 including the overlap with AZDup (fig. 3b). This is especially true when compared to the CS-2  
196 enrichment of AZDup genes not targeted by BRM or BRM targets not among AZDup (fig. 3b  
197 and supplementary fig. 3b). Then, our GO analysis demonstrates that AZDup genes which  
198 overlap with BRM target genes are mostly biotic stress related, while BRM targets not  
199 suppressed by TOR are mostly related to transcriptional regulation (fig. 3c).

200  
201 While keeping in mind the bistability of CS-2, we analyzed the overlap between the TrxG  
202 component BRM targets and the PcG component LHP1 targets. A total of 1216 genes are co-  
203 targeted by BRM and LHP1, among which 240 genes appeared as AZDup (supplementary fig.  
204 3c). Further reinforcing a functional link between TOR repressed genes and bistable chromatin,  
205 these genes show the highest CS-2 enrichment in this study. Furthermore, this result suggests  
206 that BRM and LHP1 together act on TOR repressed genes to establish chromatin bistability  
207 (supplementary fig. 3d). Our GO analysis reveals a preferential enrichment in biotic stress  
208 related terms for the CS-2 category, while the Cs-5 was preferentially enriched in GO terms  
209 related to oxidative stress and hypoxia. This observation suggests a functional dichotomy  
210 between AZDup genes co-targeted by BRM and LHP1 in CS-2 and AZDup genes targeted by  
211 LHP1 in CS-5. Notably, the 976 genes co-targeted by BRM and LHP1 but not upregulated upon  
212 TOR inhibition preferentially belong to TOR-independent functional categories, e.g., salinity  
213 response, auxin and gibberellin signaling at CS2; transcription regulation and cell wall  
214 modification at CS-5 (supplementary fig. 3e-g).

215  
216 The proposed functional dichotomy among TOR repressed genes implies that, within CS-2,  
217 BRM may specifically activate genes involved in defense mechanism upon TOR inhibition by a  
218 biotic stress signal. In agreement, it has been previously shown that over-expression of TOR  
219 increased the susceptibility to both bacterial and fungal infections (De Vleeschauwer et al.,  
220 2018). To explore in more details the role of BRM in regulating biotic stress related genes  
221 within CS-2, *brm5* mutants were inoculated with the fungal pathogen *Botrytis cinerea*.  
222 Compared to the wild-type control (Col-0), *brm5* mutants exhibited an enhanced susceptibility  
223 to *B. cinerea* with a significant increase in lesion size while *clf29* did not (fig. 3d, e). Supporting  
224 our *in-silico* analyses, opposite sensitivities were observed when mutants were tested for their  
225 response to hypoxia caused by submergence. Indeed, while *brm5* behaved similarly as Col0,  
226 *clf29* mutants were significantly less resistant to submergence (fig. 3f, g). Together, our results  
227 indicate that BRM contributes to the functional specification of TOR responding genes.

### 228 229 **TOR coordinates global H3K27me3 level at different growth and developmental stages**

230 The different correlations highlight a functional link between TOR and H3K27me3  
231 transcriptional repression. We therefore hypothesize that the activation of TOR repressed  
232 targets associated with CS-2 and CS-5 may require an active removal of H3K27me3. To test  
233 this hypothesis, Arabidopsis were treated for 24 hours with AZD8055 to inhibit TOR.  
234 Interestingly, AZD8055 treatment provoked a decrease in the global level of H3K27me3  
235 (fig.4a). In a complementary approach, we also explore the impact of a TOR inhibition on the  
236 global level of H3K27me3 by means of quantitative immuno-staining on root nuclei. In  
237 agreement with the pharmaceutical inhibition of TOR by AZD8055, the level of fluorescence  
238 intensity of H3K27me3 was significantly decreased upon inhibition of TOR by estradiol-  
239 inducible TOR RNAi with fluorescence levels were intermediate between those of the mock-  
240 treated control and the *clf29* mutant (fig. 4b). Then we challenged a *clf29* with TOR inhibition.

241 *clf29* mutant did not respond to AZD8055 treatment (fig. 4c), which suggested that growth  
242 arrest by TOR inactivation was largely dependent on loss of H3K27me3.

243  
244 Both TOR kinase and H3K27me3 are important for photomorphogenesis (Charron et al., 2009;  
245 Pfeiffer et al., 2016). Charron et al., 2019 showed a global increase of H3K27me3 level across  
246 chromosomes in the seedlings transferred from darkness to light. In the darkness, COP1  
247 represses TOR activity to allow skotomorphogenesis (fig. 4d). To gain more biological insight,  
248 we further tested whether H3K27me3 level is correlated with TOR activity during  
249 photomorphogenesis. In agreement with published CHIP-seq data, light-grown seedling had  
250 higher H3K27me3 than etiolated seedlings in the dark. AZD8055 treatment significantly  
251 reduced the H3K27me3 level. In the *cop1* mutant where TOR is pre-induced in the dark  
252 (Pfeiffer et al., 2016), H3K27me3 level was also maintained high to allow photomorphogenesis  
253 of *cop1* in the dark (fig. 4e). We conclude that TOR can recruit histone-modifying complexes  
254 such as CLF/ LHP1 to regulate transcriptome via H3K27 tri-methylation.

255

## 256 Discussion

257 Our findings presented here, strongly suggest a model in which TOR amplifies the CLF function  
258 associated with LHP1 to increase the level of H3K27 tri-methylation mainly through the CLF-  
259 LHP1 in state 2 genes enriched in biotic stress responses and CS-5 genes involved in redox  
260 processes and hypoxia responses. Moreover, in conditions of TOR inactivation, BRM is  
261 responsible for removal of inhibitory H3K27 tri-methylation, possibly via demethylase REF6 (Li  
262 et al., 2016), to activate CS-2 genes mainly involved in biotic stress responses (fig. 4f). We  
263 present how a certain stress signal can go through the central master regulator TOR and target  
264 specific genomic loci. Facing the environmental challenges, plants inactivate TOR as a common  
265 response to save energy and induce stress responsive genes. When TOR is inactivated, BRM is  
266 required to induce a subset of genes involved in biotic stress.

267

268 H3K27me3 has been extensively studied in eukaryotes. This conserved histone modification  
269 targets key developmental genes but shows a drastically different landscape in plants and  
270 animals. PRC2 complex can read and write H3K27me3 and is associated with DNA in a long-  
271 range, which results in large patches of H3K27me3, in animals. In plants, H3K27me3 marks  
272 more often a single gene (Mozgova and Hennig, 2015). This difference might contribute to the  
273 dynamic regulation of gene expression by H3K27me3 in plants. Comparing to animals, plants  
274 are sessile and must constantly alter the developmental program facing environmental stimuli.  
275 High H3K27me3 level is tightly associated with cell stemness and represses early  
276 differentiation genes. In plants, TOR is highly expressed in the meristematic tissues, indicating  
277 high H3K27me3 level according to this work. Here discovered TOR-H3K27me3 relay may  
278 contribute significantly to the meristem function and plant regeneration ability which  
279 represents a fundamental difference to animals.

280

281 LHP1, a plant-specific polycomb protein, works in collaboration with CLF to deposit and spread  
282 H3K27me3, which distinguishes CLF function from PRC1-PRC2 complex (Wang et al., 2016).  
283 Strikingly, CLF and LHP1 targets are exclusively enriched in CS-5, whereas up-regulated genes  
284 in loss-of-function mutants are enriched in both CS-2 and CS-5 (fig. 2 and supplementary fig.  
285 4a). This further supports that H3K4me3 and H3K27me3 marking CS-2 are bistable instead of  
286 bivalent, which may explain the loss of targets identification by CHIP. Moreover, AZDup genes  
287 targeted by CLF is also underrepresented (supplementary fig. 4b). CLF-LHP1 mediates largely  
288 expression of TOR-responsive genes involved in biotic stress response and redox process.

289 Indeed, biotic stress response genes are marked by bistable chromatin features (CS-2), which  
290 likely indicates a rapid responsive state to the environmental stimuli. In comparison, CS-5 is  
291 stably repressed which is more associated with house-keeping function ([supplementary table](#)  
292 [1](#)).

293  
294 BRM is a phosphorylation target of the ABA-SnRK2 relay, which reciprocally regulated the TOR  
295 signaling pathway (Peirats-Llobet et al., 2016; Wang et al., 2018). TOR could inhibit BRM  
296 function through silencing ABA signaling. Moreover, BRM protein sequence contains several  
297 TOR phosphorylation consensus sites, suggesting that specific phosphorylation of BRM by  
298 TOR and/or SnRK2 can regulate its function (Van Leene et al., 2019). Many studies showed the  
299 nuclear localization of SnRK2 kinase (Peirats-Llobet et al., 2016). The canonical TOR substrate  
300 S6K2 localizes in the nucleus and phosphorylates BIN2 functioning in brassinosteroid pathway  
301 (Mahfouz et al., 2006; Xiong et al., 2017).

302  
303 In the cytoplasm, TOR might regulate H3K27me<sup>3</sup> through mRNA translation of several key  
304 enzymes involved in H3K27 methylation or demethylation. La-related protein 1 (LARP1) is a  
305 RNA binding protein conserved across eukaryotes regulating 5' terminal oligopyrimidine motif  
306 (5'TOP) mRNA translation. Recent studies showed that TOR phosphorylates LARP1 in plants  
307 and can regulate the translation efficiency of 5'TOP-mRNAs that encode proteins involved in  
308 chromatin remodeling, e.g. LHP1 (Scarpin et al., 2020; Van Leene et al., 2019). In addition, TOR  
309 may regulate the availability of a methylation substrate, S-adenosyl-methionine (SAM) that  
310 functions in the methionine-folate cycle. Interestingly, MTHFD1 is a folate cycle enzyme  
311 impacting global DNA methylation in plants through SAM availability (Groth et al., 2016). In  
312 animals, mTORC1 senses SAM levels through SAMTOR and MTHFD transcription under tight  
313 control of mTORC1 (Ben-Sahra et al., 2016; Gu et al., 2017). However, it remains unknown  
314 whether plant TOR modulates DNA or histone methylation through SAM metabolism in plants.  
315 SAMTOR seems to be also a metazoan invention.

316  
317 Since H3K27me<sup>3</sup> occupies the intergenic regions, we speculate that TOR impacts  
318 transcriptome through intergenic non-coding RNAs. In plants, AZD8055-mediated TOR  
319 inhibition can induce long non-coding RNA expression which is often marked by H3K27me<sup>3</sup>  
320 (Song et al., 2018). This suggests that global decrease of H3K27me<sup>3</sup> level in conditions of TOR  
321 inactivation could also affect transcription or translation through long non-coding RNAs. Our  
322 finding reveals a missing link from environmental sensing to epigenetic regulation. In the  
323 future, it will be of great interest to dissect this signaling pathway and investigate mechanism  
324 of the TOR-dependent epigenetic reprogramming at different stages of developmental  
325 transition and responses to environment.

326

### 327 **Acknowledgement**

328 We thank D. Janocha (University of Heidelberg) for providing *cop1* mutants, French Agence  
329 Nationale de la Recherche— ANR-18-CE13-0019 – ReinitiaTOR to L.R. and 2020 Marie Curie  
330 fellowship 885864 TORinacTion MSCA-IF-EF-ST to Y.D.

331

### 332 **Author contribution**

333 Y.D. and V.U.U. initiated the project. Y.D., V.U.U., A.B. and C.P. contributed to experiment  
334 design and project development. Y.D. coordinated the project and performed experiments.  
335 V.U.U. and V.A.S performed bioinformatic analysis. A.B. and G.S. performed immuno-staining.

336 Y.D. and T.H. performed *B. cinerea* infection. Y.D., V.U.U. and A.B. made figures and wrote the  
337 manuscript. C.P., T.H. and L.R. revised the manuscript.

338

### 339 **Declaration of interest**

340 The authors declare that the research was conducted in the absence of any commercial or  
341 financial relationships that could result in any potential conflict of interest.

342

### 343 **Methods**

#### 344 **Plant materials and growth condition**

345 *Arabidopsis thaliana* mutant plants, as well as wild-type control plants were the Columbia  
346 (Col-0) ecotype. Wild-type plants (N1092) and *brm-5* (N68980) were gained from the  
347 European Arabidopsis Stock Centre. *clf-29* (SALK\_021003) mutant was described in Wang et  
348 al., 2016 (Wang et al., 2016). *cop1-4* was described in (Pfeiffer et al., 2016).  $\beta$ -estradiol  
349 inducible TOR-RNAi line was described in (Xiong et al., 2013). All seedlings were grown on  
350 1/2MS medium (pH5.7, 0.8% agar) in a long-day climate chamber (16 h light/8 h dark; 80-100  
351  $\mu$ mol m<sup>-2</sup>s<sup>-1</sup>; 22°C day/18°C night; 50% humidity). Chemical inhibitor treatments were  
352 performed with media containing 0.2  $\mu$ M AZD-8055 for 10 days or 1  $\mu$ M for 24 hours.  
353 Submergence was performed with 5 week soil-grown plants for 24 hours and recovered for 1  
354 week in the short-day climate chamber (12 h light/12 h dark).

355

#### 356 **Western blot**

357 For immunological detection, total soluble proteins were extracted from 50 mg plant  
358 materials with 250  $\mu$ l 2x Laemmli buffer. Proteins were denatured for 5 min at 95°C and  
359 separated on 15% SDS-PAGE. Subsequently, proteins were blotted to PVDF membrane. The  
360 primary antibodies anti-H3K27me3 (1:5000, Agrisera, AS16-3193) and anti-H3 (1:5000,  
361 Agrisera, AS10-710) were detected using the HRP-conjugated secondary antibody (1:20,000).

362

#### 363 **Fungi infection**

364 *B. cinerea* was inoculated on 5-week-old soil-grown plants in a short-day chamber (12 h  
365 light/12 h dark; 80-100  $\mu$ mol m<sup>-2</sup>s<sup>-1</sup>; 22°C day/18°C night; 50% humidity). For the lesion assay,  
366 5- $\mu$ L droplets of *B. cinerea* spore suspension were placed directly on the upper surface of the  
367 leaf. After inoculation, plants were kept with full humidity to facilitate the infection. Lesions  
368 were measured 3 days after the inoculation.

369

#### 370 **Chromatin state enrichment analysis**

371 Chromatin states were defined based on Hidden Markov Model (HMM) and previously  
372 defined coordinates were extracted (Sequeira-Mendez et al., 2014). The gene sets are given  
373 in [supplementary table 2](#). Transcription start sites (TSS) and transcription termination sites  
374 (TTS) are downloaded from [www.arabidopsis.org](http://www.arabidopsis.org) (TAIR10). An array is formed for each region  
375 of interest. GenomicRanges R-package was used to match the genes in each set with a  
376 chromatin state (Lawrence et al., 2013). The enrichment of chromatin states were calculated  
377 by odd ratio (OR) and False Discovery Rate (FDR) adjusted p values were used to define the  
378 significance of OR. Statistical comparison of different ORs were performed by Fisher's exact  
379 test and statistical significance threshold is taken as p<0.05.

380

#### 381 **Immunostaining and microscopy**

382 Immunostaining was performed as described previously (Batzenschlager et al., 2015) on 7-  
383 days-old *in-vitro* grown seedlings of Col-0, TOR-RNAi and *clf-29* treated or not for 24h with 10



384  $\mu\text{M}$   $\beta$ -estradiol. Antibodies used for immunostaining were the anti-H3K27me3 (1:500) and the  
385 Alexa fluor-488 dyes-conjugated secondary antibody (1:1000, Life Technologies, A-11008).  
386 The H3K27me3 signal intensity for each nucleus was calculated relative to the intensity of  
387 DAPI using ImageJ software. Confocal images were acquired with a Zeiss LSM-700 microscope  
388 with a 63x/1.01 objective.

389

## 390 References

391 Batzenschlager, M., Lermontova, I., Schubert, V., Fuchs, J., Berr, A., Koini, M.A., Houlne, G.,  
392 Herzog, E., Rutten, T., Alioua, A., *et al.* (2015). Arabidopsis MZT1 homologs GIP1 and GIP2 are  
393 essential for centromere architecture. *Proc. Natl. Acad. Sci. U. S. A.* *112*, 8656-8660.

394 Ben-Sahra, I., Hoxhaj, G., Ricoult, S.J.H., Asara, J.M., and Manning, B.D. (2016). mTORC1  
395 induces purine synthesis through control of the mitochondrial tetrahydrofolate cycle. *Science*  
396 *351*, 728-733.

397 Caldana, C., Li, Y., Leisse, A., Zhang, Y., Bartholomaeus, L., Fernie, A.R., Willmitzer, L., and  
398 Giavalisco, P. (2013). Systemic analysis of inducible target of rapamycin mutants reveal a  
399 general metabolic switch controlling growth in *Arabidopsis thaliana*. *The Plant Journal* *73*,  
400 897-909.

401 Charron, J.B., He, H., Elling, A.A., and Deng, X.W. (2009). Dynamic landscapes of four histone  
402 modifications during deetiolation in Arabidopsis. *Plant Cell* *21*, 3732-3748.

403 De Vleeschauwer, D., Filipe, O., Hoffman, G., Seifi, H.S., Haeck, A., Canlas, P., Van Bockhaven,  
404 J., De Waele, E., Demeestere, K., Ronald, P., *et al.* (2018). Target of rapamycin signaling  
405 orchestrates growth-defense trade-offs in plants. *New Phytol.* *217*, 305-319.

406 Dong, P., Xiong, F., Que, Y., Wang, K., Yu, L., Li, Z., and Maozhi, R. (2015). Expression profiling  
407 and functional analysis reveals that TOR is a key player in regulating photosynthesis and  
408 phytohormone signaling pathways in Arabidopsis. *Frontiers in Plant Science* *6*.

409 Fu, L., Liu, Y., Qin, G., Wu, P., Zi, H., Xu, Z., Zhao, X., Wang, Y., Li, Y., Yang, S., *et al.* (2021). The  
410 TOR-EIN2 axis mediates nuclear signalling to modulate plant growth. *Nature.* *591*, 288-292.

411 Gomez-Zambrano, A., Merini, W., and Calonje, M. (2019). The repressive role of Arabidopsis  
412 H2A.Z in transcriptional regulation depends on AtBMI1 activity. *Nat. Commun.* *10*, 2828.

413 Groth, M., Moissiard, G., Wirtz, M., Wang, H.F., Garcia-Salinas, C., Ramos-Parra, P.A., Bischof,  
414 S., Feng, S.H., Cokus, S.J., John, A., *et al.* (2016). MTHFD1 controls DNA methylation in  
415 Arabidopsis. *Nat. Commun.* *7*.

416 Gu, X., Orozco, J.M., Saxton, R.A., Condon, K.J., Liu, G.Y., Krawczyk, P.A., Scaria, S.M., Harper,  
417 J.W., Gygi, S.P., and Sabatini, D.M. (2017). SAMTOR is an S-adenosylmethionine sensor for the  
418 mTORC1 pathway. *Science* *358*, 813-818.

419 Laribee, R.N., and Weisman, R. (2020). Nuclear Functions of TOR: Impact on Transcription and  
420 the Epigenome. *Genes (Basel)* *11*.

421 Lawrence, M., Huber, W., Pages, H., Aboyoun, P., Carlson, M., Gentleman, R., Morgan, M.T.,  
422 and Carey, V.J. (2013). Software for computing and annotating genomic ranges. *PLoS Comput.*  
423 *Biol.* *9*, e1003118.

424 Li, C., Gu, L., Gao, L., Chen, C., Wei, C.Q., Qiu, Q., Chien, C.W., Wang, S., Jiang, L., Ai, L.F., *et al.*  
425 (2016). Concerted genomic targeting of H3K27 demethylase REF6 and chromatin-remodeling  
426 ATPase BRM in Arabidopsis. *Nat. Genet.* *48*, 687-693.

427 Liu, Y., Tian, T., Zhang, K., You, Q., Yan, H., Zhao, N., Yi, X., Xu, W., and Su, Z. (2018). PCSD: a  
428 plant chromatin state database. *Nucleic Acids. Res.* *46*, D1157-D1167.

429 Mahfouz, M.M., Kim, S., Delauney, A.J., and Verma, D.P. (2006). Arabidopsis TARGET OF  
430 RAPAMYCIN interacts with RAPTOR, which regulates the activity of S6 kinase in response to  
431 osmotic stress signals. *Plant Cell* *18*, 477-490.

432 Mozgova, I., and Hennig, L. (2015). The polycomb group protein regulatory network. *Annu.*  
433 *Rev. Plant Biol.* *66*, 269-296.

434 Peirats-Llobet, M., Han, S.K., Gonzalez-Guzman, M., Jeong, C.W., Rodriguez, L., Belda-Palazon,  
435 B., Wagner, D., and Rodriguez, P.L. (2016). A Direct Link between Abscisic Acid Sensing and  
436 the Chromatin-Remodeling ATPase BRAHMA via Core ABA Signaling Pathway Components.  
437 *Mol. Plant* *9*, 136-147.

438 Pfeiffer, A., Janocha, D., Dong, Y., Medzihradzsky, A., Schöne, S., Daum, G., Suzaki, T., Forner,  
439 J., Langenecker, T., Rempel, E., *et al.* (2016). Integration of light and metabolic signals for stem  
440 cell activation at the shoot apical meristem. *eLife* *5*, e17023.

441 Ringrose, L. (2017). Noncoding RNAs in Polycomb and Trithorax regulation: a quantitative  
442 perspective. *Annu. Rev. Genet.* *51*, 385-411.

443 Saxton, R.A., and Sabatini, D.M. (2017). mTOR Signaling in Growth, Metabolism, and Disease.  
444 *Cell* *169*, 361-371.

445 Scarpin, M.R., Leiboff, S., and Brunkard, J.O. (2020). Parallel global profiling of plant TOR  
446 dynamics reveals a conserved role for LARP1 in protein translation. *Elife* *9*, e58795.

447 Schwartz, Y.B., Kahn, T.G., Stenberg, P., Ohno, K., Bourgon, R., and Pirrotta, V. (2010).  
448 Alternative epigenetic chromatin states of polycomb target genes. *PLoS Genet.* *6*, e1000805.

449 Sequeira-Mendes, J., Araguez, I., Peiro, R., Mendez-Giraldez, R., Zhang, X., Jacobsen, S.E.,  
450 Bastolla, U., and Gutierrez, C. (2014). The functional topography of the Arabidopsis genome is  
451 organized in a reduced number of linear motifs of chromatin states. *Plant Cell* *26*, 2351-2366.

452 Shu, J., Chen, C., Li, C., and Cui, Y. (2020). The complexity of PRC2 catalysts CLF and SWN in  
453 plants. *Biochem. Soc. Trans.* *48*, 2779-2789.

454 Sneppen, K., and Ringrose, L. (2019). Theoretical analysis of Polycomb-Trithorax systems  
455 predicts that poised chromatin is bistable and not bivalent. *Nat. Commun.* *10*, 2133.

456 Song, Y., Li, L., Yang, Z., Zhao, G., Zhang, X., Wang, L., Zheng, L., Zhuo, F., Yin, H., Ge, X., *et al.*  
457 (2018). Target of Rapamycin (TOR) regulates the expression of lncRNAs in response to abiotic  
458 stresses in cotton. *Front. Genet.* *9*, 690.

459 Torres, E.S., and Deal, R.B. (2019). The histone variant H2A.Z and chromatin remodeler  
460 BRAHMA act coordinately and antagonistically to regulate transcription and nucleosome  
461 dynamics in Arabidopsis. *Plant J.* *99*, 144-162.

462 Van Leene, J., Han, C., Gadeyne, A., Eeckhout, D., Matthijs, C., Cannoot, B., De Winne, N.,  
463 Persiau, G., Van De Slijke, E., Van de Cotte, B., *et al.* (2019). Capturing the phosphorylation and  
464 protein interaction landscape of the plant TOR kinase. *Nat. Plants* *5*, 316-327.

465 Wang, H., Liu, C., Cheng, J., Liu, J., Zhang, L., He, C., Shen, W.H., Jin, H., Xu, L., and Zhang, Y.  
466 (2016). Arabidopsis flower and embryo developmental genes are repressed in seedlings by  
467 different combinations of Polycomb group proteins in association with distinct sets of cis-  
468 regulatory elements. *PLoS Genet.* *12*, e1005771.

469 Wang, P., Zhao, Y., Li, Z., Hsu, C.C., Liu, X., Fu, L., Hou, Y.J., Du, Y., Xie, S., Zhang, C., *et al.* (2018).  
470 Reciprocal regulation of the TOR kinase and ABA receptor balances plant growth and stress  
471 response. *Mol. Cell* *69*, 100-112 e106.

472 Xiong, F., Zhang, R., Meng, Z., Deng, K., Que, Y., Zhuo, F., Feng, L., Guo, S., Datla, R., and Ren,  
473 M. (2017). Brassinosteroid Insensitive 2 (BIN2) acts as a downstream effector of the Target of  
474 Rapamycin (TOR) signaling pathway to regulate photoautotrophic growth in Arabidopsis. *New*  
475 *Phytol.* *213*, 233-249.

476 Xiong, Y., McCormack, M., Li, L., Hall, Q., Xiang, C., and Sheen, J. (2013). Glucose-TOR signalling  
477 reprograms the transcriptome and activates meristems. *Nature* *496*, 181-186.

478  
479

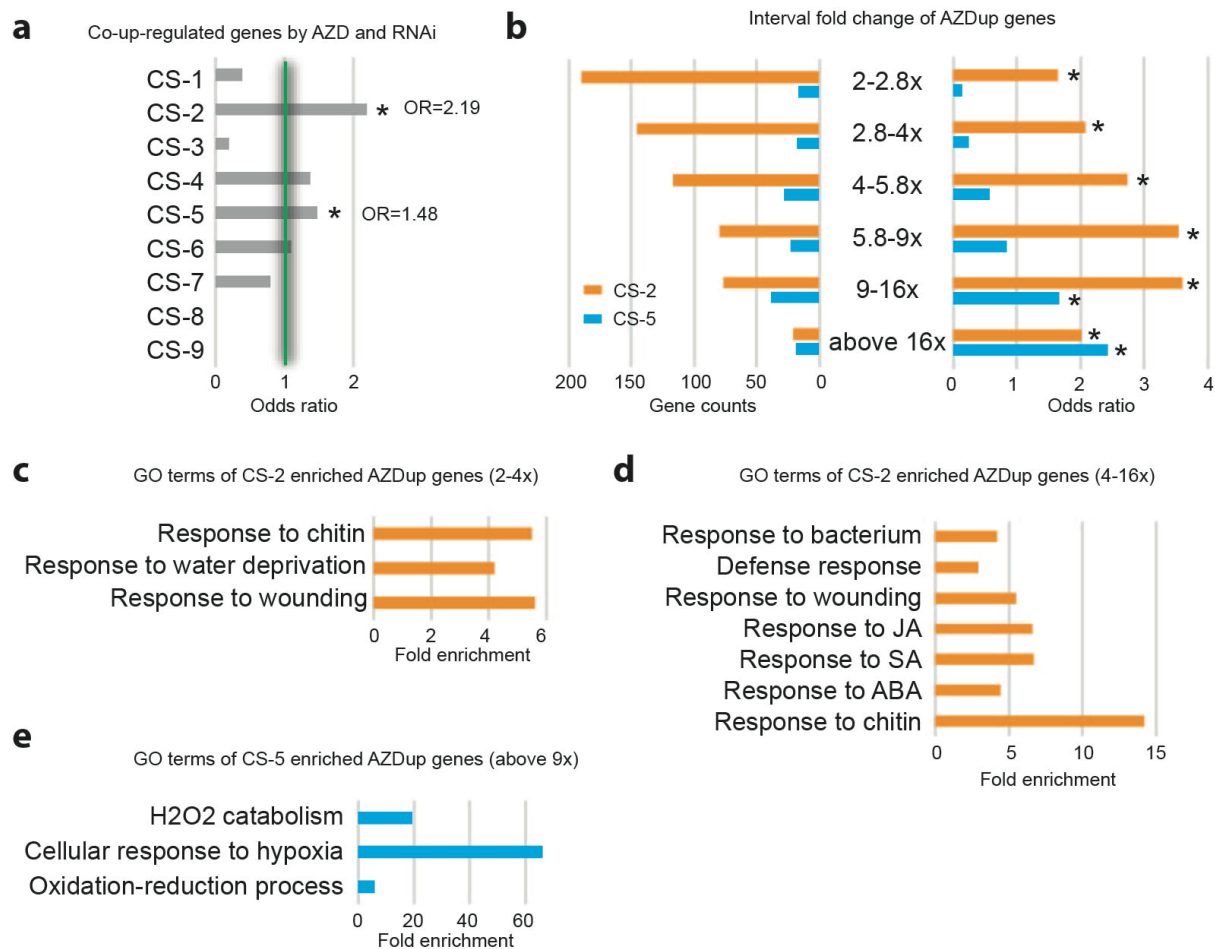

480  
481  
482  
483  
484  
485  
486  
487  
488

**Figure 1 CS-2 and -5 specify the functional groups of TOR-responsive genes.** (a) Enrichment of co-up-regulated genes by both AZD8055 and TOR RNAi in different chromatin states (CS; \*, odds ratio > 1 and p < 0.05). Different chromatin states were defined by Sequeira-Mendes *et al.*, 2014 (Sequeira-Mendes *et al.*, 2014). (b) Enrichment and gene counts of different interval fold-change of up-regulated genes by AZD8055 (AZDUp) in CS-2 and CS-5 (\*, odds ratio > 1 and p < 0.05). (c-e) Functional category analysis of AZDUp CS-2 genes with 2-4 fold, 4-16 fold and CS-5 genes up-regulated at least 9 fold (p < 0.01, FDR < 0.1).

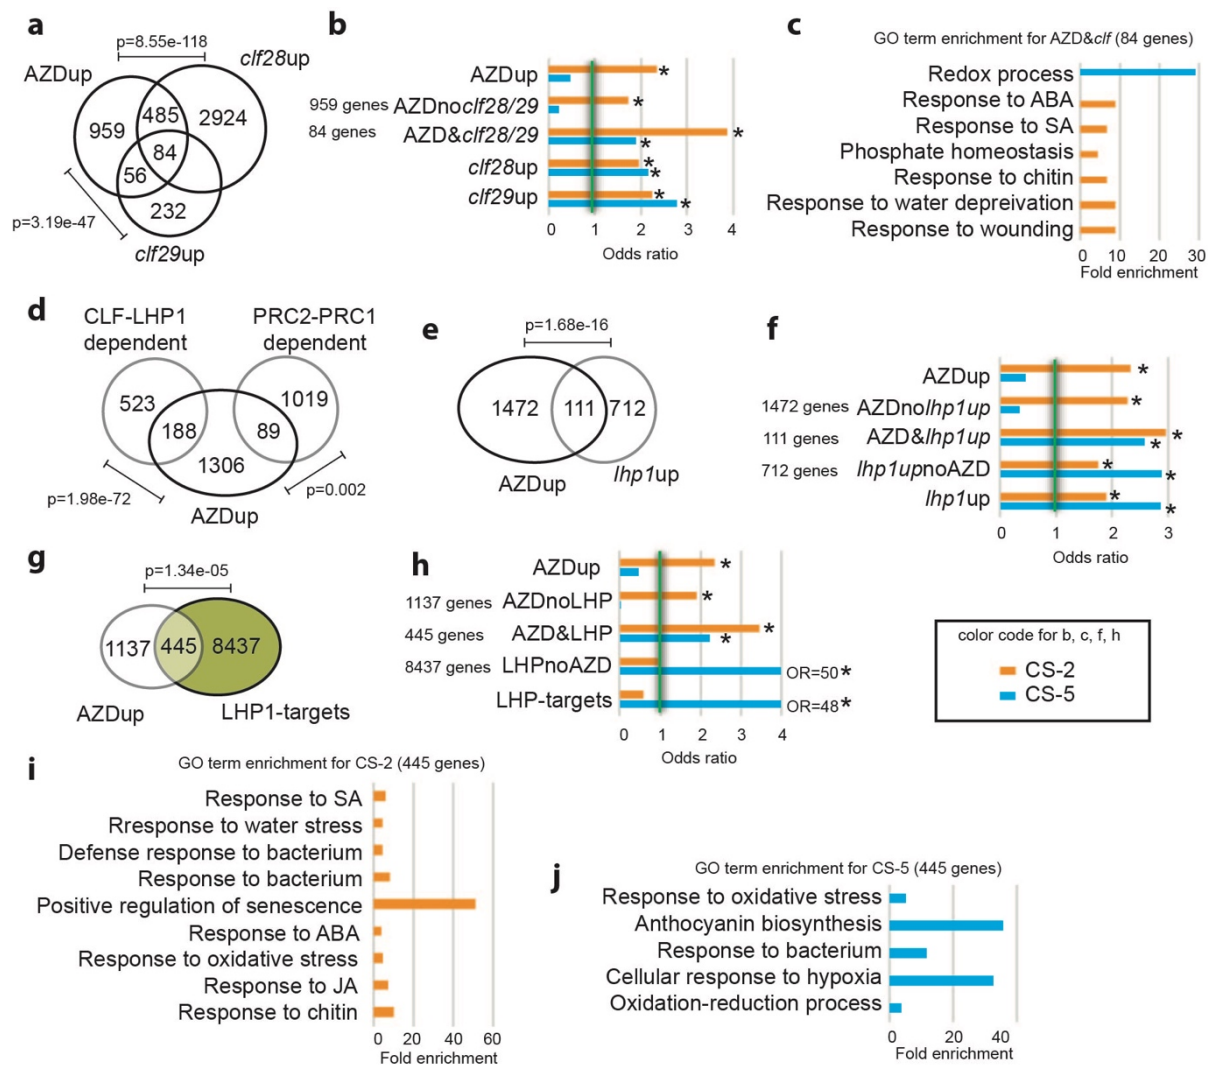

489  
 490  
 491  
 492  
 493  
 494  
 495  
 496  
 497  
 498  
 499  
 500  
 501  
 502  
 503  
 504

**Figure 2 TOR represses both CS-2 and 5 genes via CLF in specific context with LHP1.** (a) overlap of up-regulated genes by AZD8055 (AZDup), in *clf28* mutant (*clf28up*, hypergeometric test) and in *clf29* mutant (*clf29up2x*, hypergeometric test). (b) Enrichment of genes from different intersection between AZDup, *clf28up* and *clf29up* presented in (a) (\*, OR>1 and  $p<0.05$ ). (c) Functional category analysis of co-up-regulated genes by AZD8055 and in *clf28/29* enriched in CS-2 and CS-5 ( $p<0.01$ , FDR<0.1). (d) overlap of up-regulated genes by AZD8055 (AZDup) and context-dependent CLF regulated genes (hypergeometric test). (e) overlap of up-regulated genes by AZD8055 (AZDup) and in *lhp1* mutant (*lhp1up*) (hypergeometric test). (f) Enrichment of genes from different intersection between AZDup and *lhp1up* presented in (e) (\*, OR>1 and  $p<0.05$ ). (g) overlap between genes up-regulated by AZD8055 (AZDup) and LHP1 target genes (hypergeometric test). (h) Enrichment of genes from different intersection between AZDup and LHP1 targets presented in (g) (\*, OR>1 and  $p<0.05$ ). (i, j) Functional category analysis of LHP1-targeted AZDup genes from CS-2 (i) and CS-5 (j) ( $p<0.01$ , FDR<0.1).

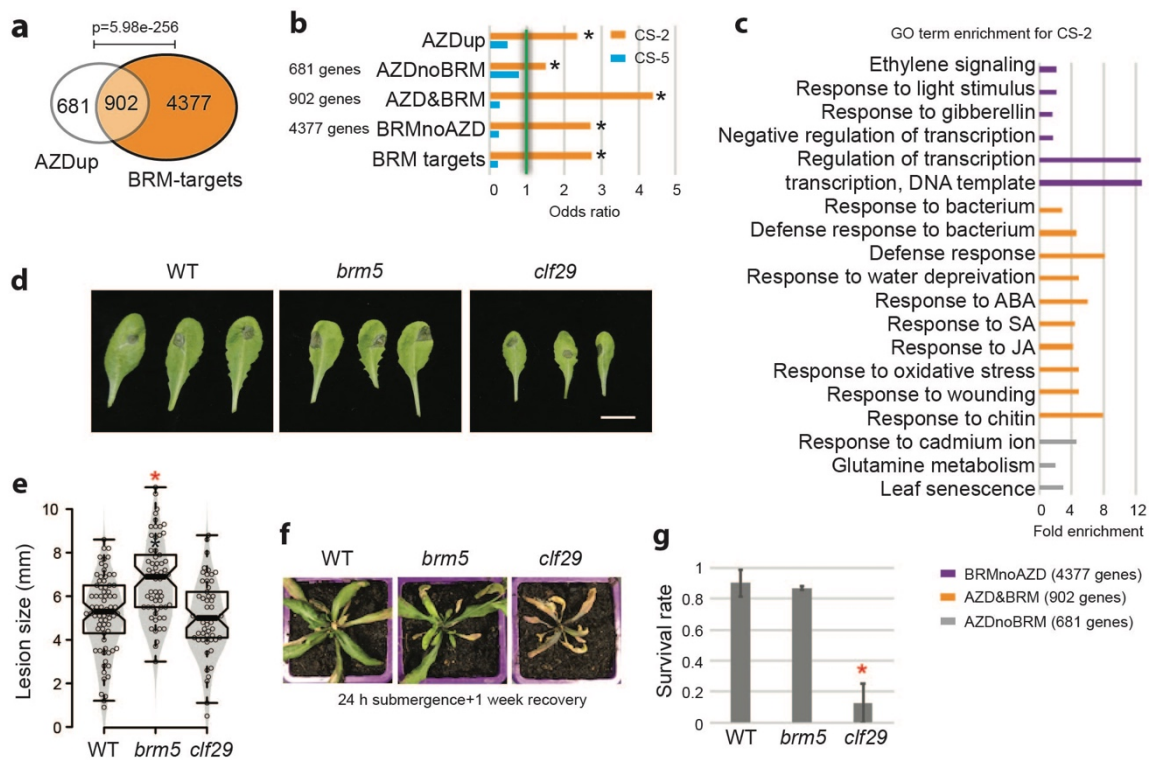

505  
 506 **Figure 3 BRM specifically activates CS-2 genes to induce biotic stress response upon TOR**  
 507 **inhibition.** (a) overlap of up-regulated genes by AZD8055 (AZDUp) and BRM target genes  
 508 (hypergeometric test). (b) Enrichment of genes from different intersection between AZDUp  
 509 and BRM targets presented in (a) (\*, OR>1 and  $p < 0.05$ ). (c) Functional category analysis of CS-  
 510 2 enriched AZDUp genes and BRM targets presented in (b) ( $p < 0.01$ , FDR<0.1). (d) leaf  
 511 phenotype and (e) lesion size of *brm5* and *clf29* mutants infected by *B. cinerea* compared to  
 512 col-0 ( $n > 50$ , central bars of the notched box represent the median, notches indicate 95%  
 513 confidential interval, \*,  $p < 0.05$ , One-way ANOVA). (f) growth phenotype and (g) survival rate  
 514 of *brm5* and *clf29* mutants challenged by 24 hours submergence and recovered for another  
 515 week ( $n = 3$ , mean  $\pm$  s.d., \*,  $p < 0.05$ , One-way ANOVA).  
 516  
 517

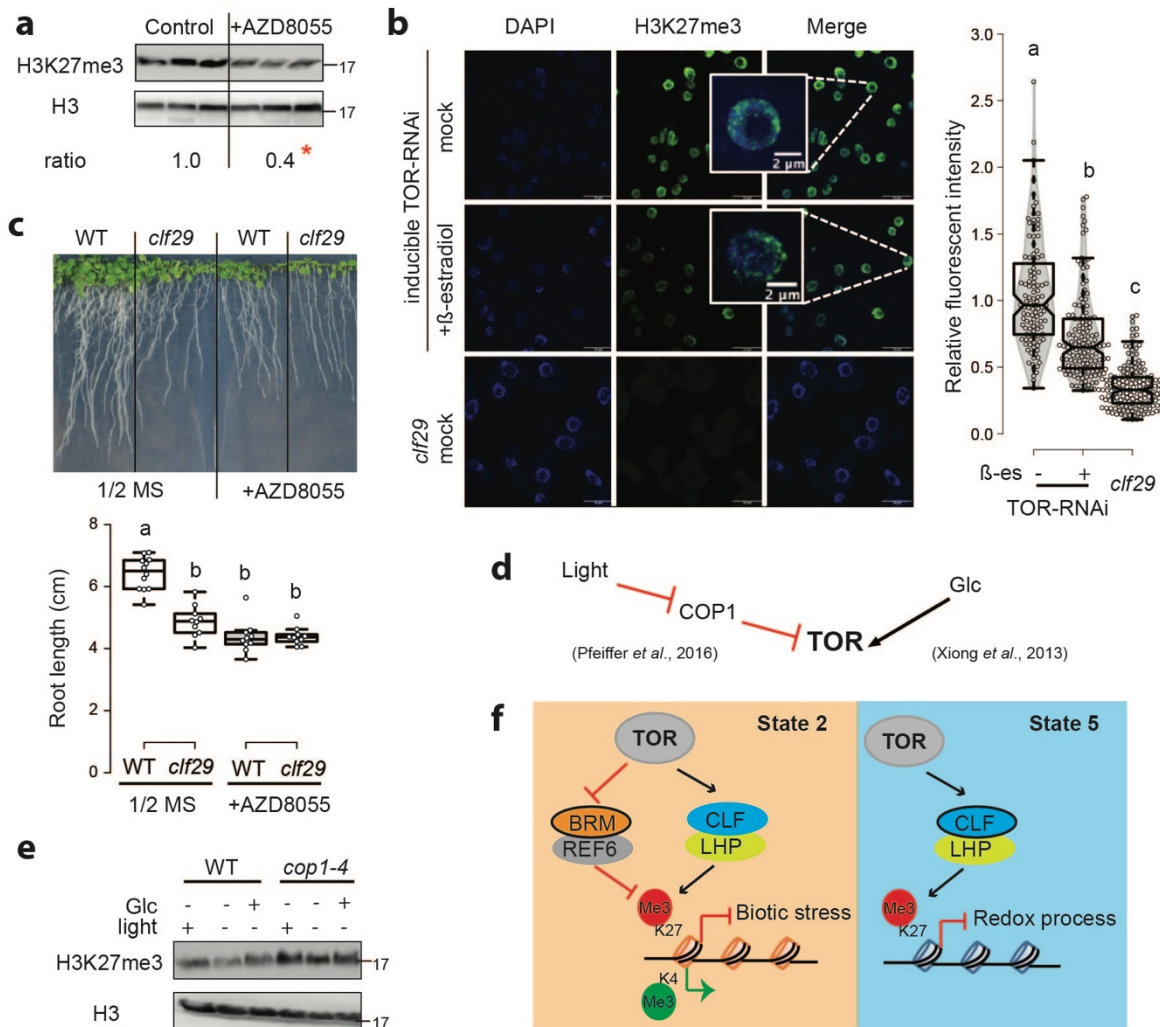

518  
 519 **Figure 4 TOR coordinates global H3K27me<sup>3</sup> level at different growth and developmental**  
 520 **stages.** (a) H3K27me3 level was determined in Arabidopsis leaves treated with 1  $\mu$ M AZD8055  
 521 for 24 hours (n=3, t-test, \*, p<0.05). (b) Immuno-staining of H3K27me3 in  $\beta$ -estradiol inducible  
 522 TOR-RNAi line and *clf29* mutant. Relative fluorescent signal was normalized against DAPI  
 523 signal (notches indicate 95% confidential interval, letters indicating statistic difference, One-  
 524 Way ANOVA, p<0.05). (c) WT and *clf29* were germinated and grown on 1/2 MS medium or 1/2  
 525 MS supplemented with 0.2  $\mu$ M AZD for 10 days. Bar, 1.5 cm. Root length was determined  
 526 (n>10, one-way ANOVA, different letters indicated significant difference, p<0.05). (d)  
 527 schematic presentation of TOR regulated by light/COP1 or Glucose (Glc) signal. (e) WT and  
 528 *cop1* mutant were grown under different conditions for 4 days. H3K27me3 and H3 level were  
 529 determined by western blot. (f) Proposed model of TOR function in controlling genes involved  
 530 in biotic stress and genes that alter the redox state. We propose the following scenario: active  
 531 TOR up-regulates CLF and LHP1 to deposit the repressive mark H3K27me3 in the bistable  
 532 chromatin state 2 (CS2) and the Polycomb-associated chromatin state 5 (CS5). TOR  
 533 inactivation under biotic stress conditions restores the active CS2 state by BRM that removes  
 534 the repressive epigenetic mark.

535  
 536  
 537  
 538

539 **Supplementary table 1: Functional category analysis of genes from each chromatin state**  
 540 **(CS).**

| Chromatin State | GO term                                                                 | # genes | p-value  |
|-----------------|-------------------------------------------------------------------------|---------|----------|
| CS-1            | protein folding                                                         | 208     | 5.60E-21 |
|                 | mRNA processing                                                         | 139     | 1.90E-19 |
|                 | response to cadmium ion                                                 | 233     | 8.30E-19 |
|                 | protein transport                                                       | 225     | 4.30E-16 |
|                 | ribosome biogenesis                                                     | 112     | 1.60E-15 |
|                 | RNA splicing                                                            | 108     | 6.10E-15 |
|                 | intracellular protein transport                                         | 138     | 3.40E-13 |
| CS-2            | response to chitin                                                      | 64      | 2.70E-06 |
|                 | response to karrikin                                                    | 62      | 2.70E-06 |
|                 | response to salicylic acid                                              | 69      | 1.60E-05 |
|                 | response to gibberellin                                                 | 47      | 3.00E-04 |
|                 | defense response                                                        | 205     | 3.20E-03 |
|                 | response to jasmonic acid                                               | 62      | 3.70E-03 |
|                 | ethylene-activated signaling pathway                                    | 69      | 3.70E-03 |
| CS-3            | rRNA modification                                                       | 7       | 1.00E+00 |
|                 | glycosyl compound metabolic process                                     | 4       | 1.00E+00 |
|                 | translational elongation                                                | 24      | 1.00E+00 |
| CS-4            | killing of cells of other organism                                      | 137     | 4.60E-83 |
|                 | defense response to fungus                                              | 145     | 2.30E-59 |
|                 | translational elongation                                                | 107     | 3.80E-15 |
| CS-5            | regulation of transcription, DNA-templated                              | 494     | 1.20E-16 |
|                 | transcription, DNA-templated                                            | 445     | 6.20E-16 |
|                 | cell differentiation                                                    | 108     | 1.20E-14 |
|                 | SCF-dependent proteasomal ubiquitin-dependent protein catabolic process | 66      | 4.30E-13 |
|                 | oxidation-reduction process                                             | 324     | 6.40E-13 |
|                 | hydrogen peroxide catabolic process                                     | 46      | 1.30E-11 |
| CS-6            | pectin catabolic process                                                | 45      | 2.40E-09 |
|                 | protein phosphorylation                                                 | 113     | 3.10E-15 |
| CS-7            | translational elongation                                                | 39      | 8.00E-25 |
|                 | translation                                                             | 39      | 5.60E-18 |
| CS-8            | translational elongation                                                | 114     | 1.10E-66 |
|                 | translation                                                             | 124     | 4.30E-54 |
|                 | killing of cells of other organism                                      | 33      | 7.70E-13 |
|                 | defense response to fungus                                              | 33      | 1.80E-07 |
|                 | oxalate metabolic process                                               | 9       | 4.90E-06 |
|                 | SCF-dependent proteasomal ubiquitin-dependent protein catabolic process | 14      | 4.40E-04 |
| CS-9            | proteolysis                                                             | 10      | 9.50E-06 |

541  
542

543

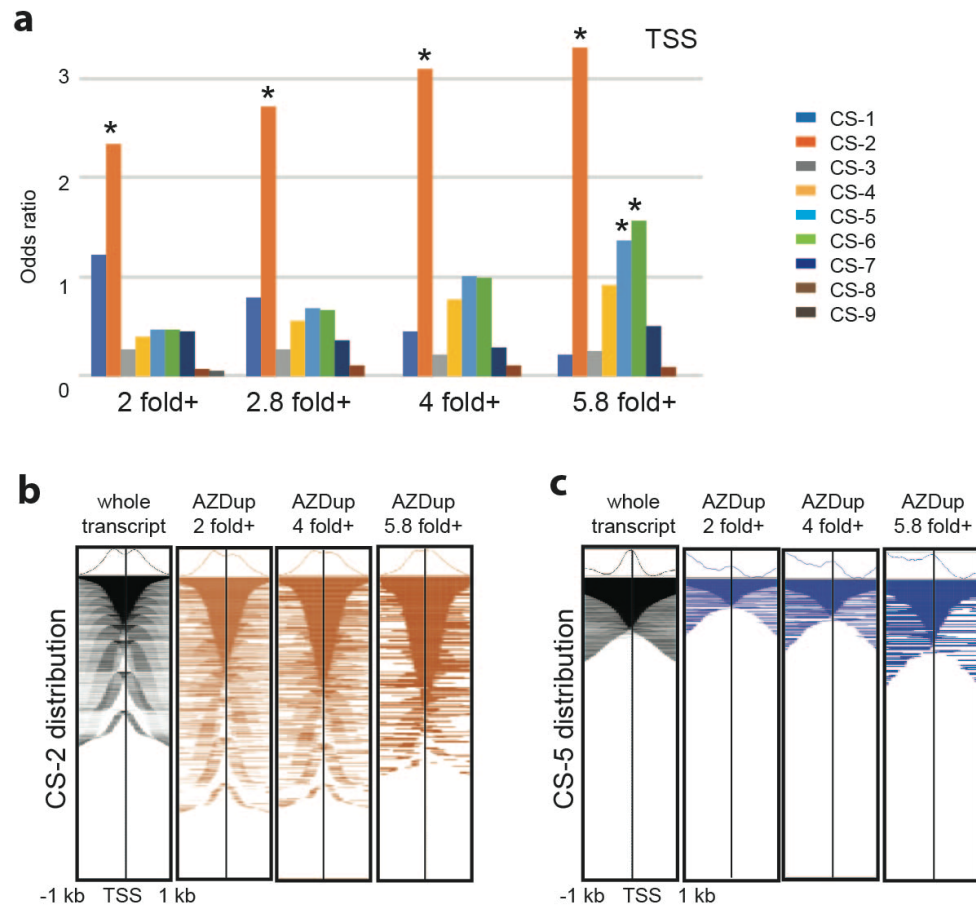

544

545

546

547

548

**Supplementary figure 1:** (a) Enrichment of up-regulated genes by AZD8055 over 2, 2.8, 4 or 5.8 fold at Transcription start site (TSS) (\*, OR>1 and p<0.05). (b, c) Heat map presenting the enrichment of up-regulated genes by AZD8055 over 2, 2.8 or 5.8 fold in CS-2 and CS-5 at TSS.



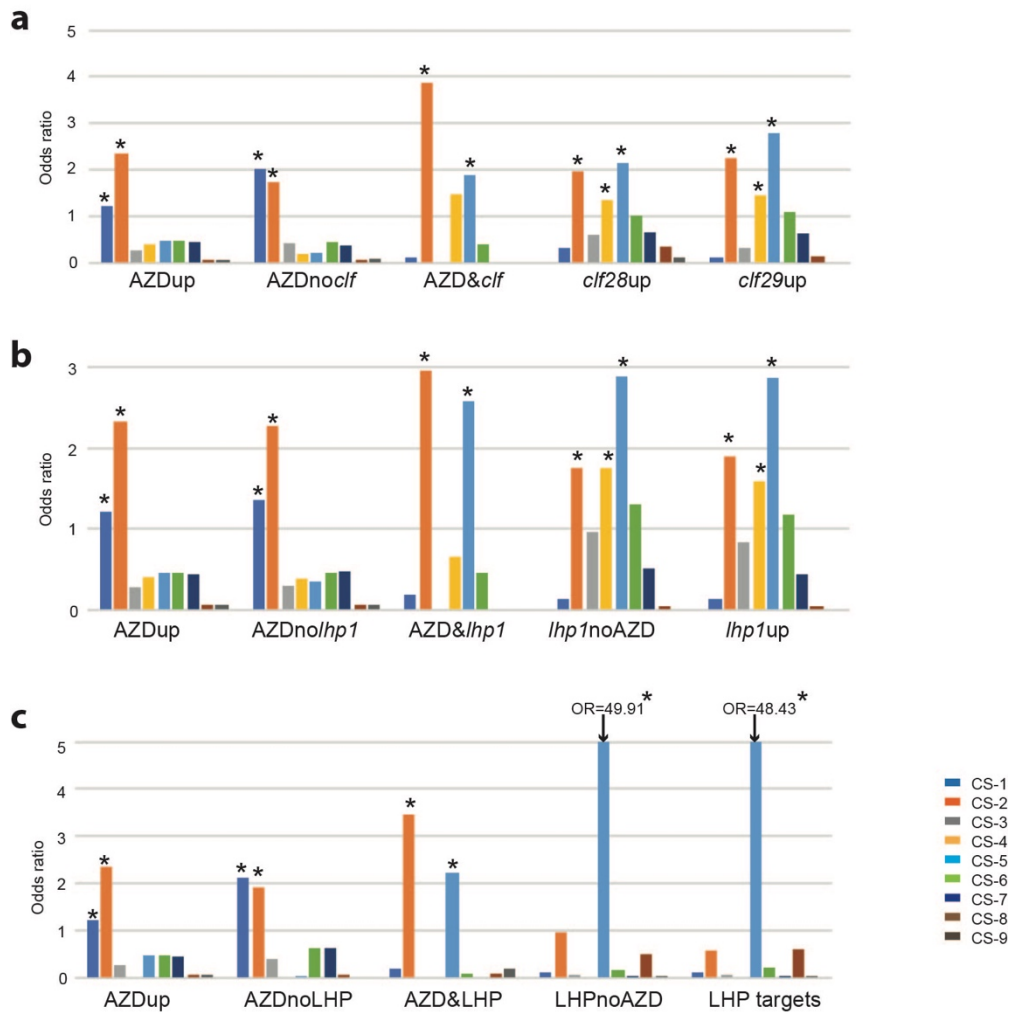

549  
550  
551  
552  
553  
554  
555

**Supplementary figure 2:** (a) Enrichment of genes from different intersection between AZD<sub>dup</sub> and up-regulated genes in *clf* mutants presented in fig. 2a. (b) Enrichment of genes from different intersection between AZD<sub>dup</sub> and up-regulated genes in *lhp1* mutants presented in fig. 2e. (c) Enrichment of genes from different intersection between AZD<sub>dup</sub> and LHP1 targets presented in fig. 2g (\*, OR>1 and p<0.05).

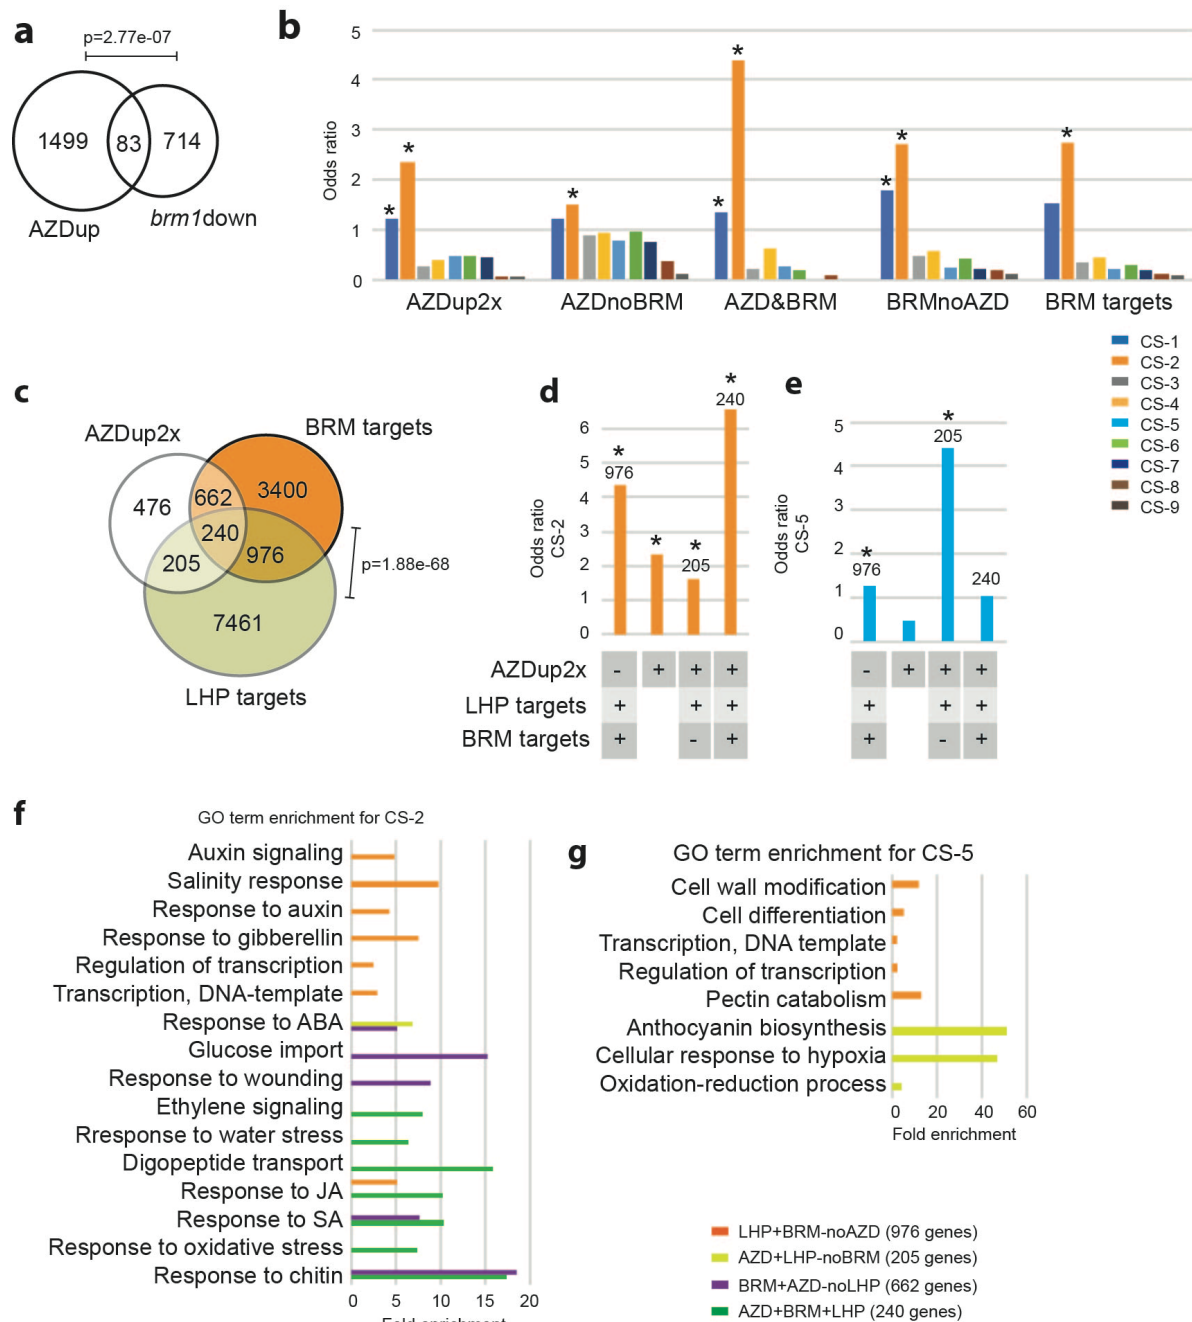

556

557

558

559

560

561

562

563

564

565

566

567

568

569

**Supplementary figure 3:** (a) overlap of up-regulated genes by AZD8055 (AZDup) and down-regulated genes in *brm1* mutant (*brm1down*). P value was calculated by the hypergeometric probability formula (\*,  $p < 0.001$ ). (b) CS enrichment of genes from different intersection between AZDup2x and BRM targets presented in fig. 3a (\*,  $OR > 1$  and  $p < 0.05$ ). (c) overlap of up-regulated genes by AZD8055 (AZDup2x), BRM targets and LHP1 targets (1216 genes,  $*p < 1.88 \times 10^{-68}$ , hypergeometric test). (d) CS-2 enrichment of genes from different intersections presented in (c) (\*,  $OR > 1$  and  $p < 0.05$ ). (e) CS-5 enrichment of genes from different intersections presented in (c) (\*,  $OR > 1$  and  $p < 0.05$ ). (f) Functional category analysis of CS-2 genes from different intersections presented in (c). (g) Functional category analysis of CS-5 genes from different intersections presented in (c). Enrichment was analyzed using total number of genes in the respective state as background ( $p < 0.01$ ,  $FDR < 0.1$ ).

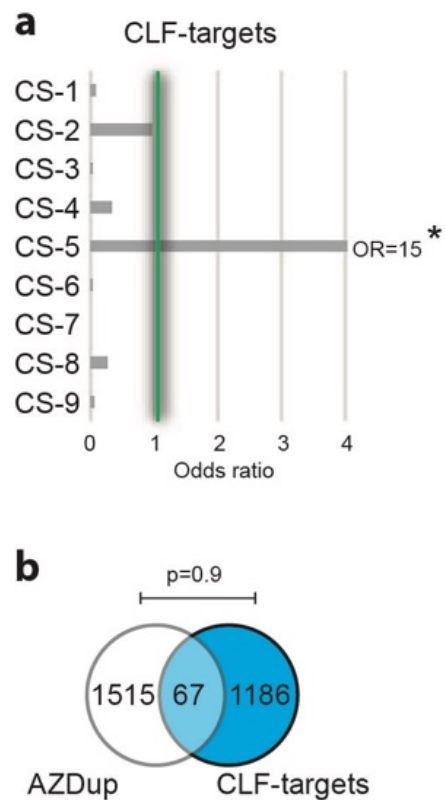

570  
571 **Supplementary figure 4:** (a) CS enrichment of CLF targets (\*, OR>1 and p<0.05). (b) overlap of  
572 up-regulated genes by AZD8055 (AZDup) and CLF targets.  
573
